# Supplementary material
Source: PubMed Central journal article supplement (PMC10132996)
Supplement: NIHMS1836339-supplement-1.pdf [file NIHMS1836339-supplement-1.pdf]

**Supplementary Table 1. Trust in cancer information from a variety of sources before and during the COVID-19 pandemic, using the original four-level response scale from HINTS 5 Cycle 2 and HINTS 5 Cycle 4**

|                                                      | <b>Before pandemic*</b> |                            | <b>During pandemic*</b> |                            |
|------------------------------------------------------|-------------------------|----------------------------|-------------------------|----------------------------|
|                                                      | <b>N**</b>              | <b>Weighted Percentage</b> | <b>N**</b>              | <b>Weighted Percentage</b> |
| <b>Government Health Agencies (n=6,854)</b>          |                         |                            |                         |                            |
| A lot                                                | 1283                    | 26.98                      | 643                     | 28.83                      |
| Some                                                 | 2195                    | 47.75                      | 1096                    | 50.10                      |
| A little                                             | 812                     | 17.89                      | 382                     | 16.73                      |
| Not at all                                           | 336                     | 7.38                       | 107                     | 4.33                       |
| <b>Doctors (n=7,251)</b>                             |                         |                            |                         |                            |
| A lot                                                | 3500                    | 73.65                      | 1812                    | 77.34                      |
| Some                                                 | 1109                    | 21.52                      | 470                     | 18.60                      |
| A little                                             | 191                     | 3.70                       | 77                      | 3.12                       |
| Not at all                                           | 62                      | 1.14                       | 30                      | 0.94                       |
| <b>Family or friends (n=6,862)</b>                   |                         |                            |                         |                            |
| A lot                                                | 439                     | 10.09                      | 195                     | 9.75                       |
| Some                                                 | 2183                    | 48.10                      | 1097                    | 48.77                      |
| A little                                             | 1684                    | 35.36                      | 788                     | 35.14                      |
| Not at all                                           | 334                     | 6.45                       | 142                     | 6.34                       |
| <b>Charitable organizations (n=6,800)</b>            |                         |                            |                         |                            |
| A lot                                                | 443                     | 9.48                       | 200                     | 9.26                       |
| Some                                                 | 1912                    | 41.11                      | 935                     | 42.08                      |
| A little                                             | 1492                    | 33.85                      | 728                     | 33.89                      |
| Not at all                                           | 748                     | 15.57                      | 342                     | 14.77                      |
| <b>Religious organizations and leaders (n=6,843)</b> |                         |                            |                         |                            |
| A lot                                                | 270                     | 6.00                       | 114                     | 6.06                       |
| Some                                                 | 1116                    | 23.68                      | 555                     | 22.84                      |
| A little                                             | 1575                    | 33.08                      | 735                     | 35.59                      |
| Not at all                                           | 1657                    | 37.24                      | 821                     | 35.51                      |

\*"Before pandemic" includes HINTS 5 Cycle 4 survey data received on or before March 11, 2020 and all HINTS 5 Cycle 2 survey data. "During pandemic" includes HINTS 5 Cycle 4 survey data received after March 11, 2020.

\*\*Frequencies are raw (not weighted).
